# Supplementary material for: Distinct but Intertwined Evolutionary Histories of Multiple Salmonella enterica Subspecies
Source: mSystems. 2020 Jan 14;5(1):e00515-19. doi: 10.1128/mSystems.00515-19 (PMC6967386; doi:10.1128/mSystems.00515-19)
Supplement: FIG S1 [file mSystems.00515-19-sf001.pdf]

# of Shared Genes

*Salmonella*

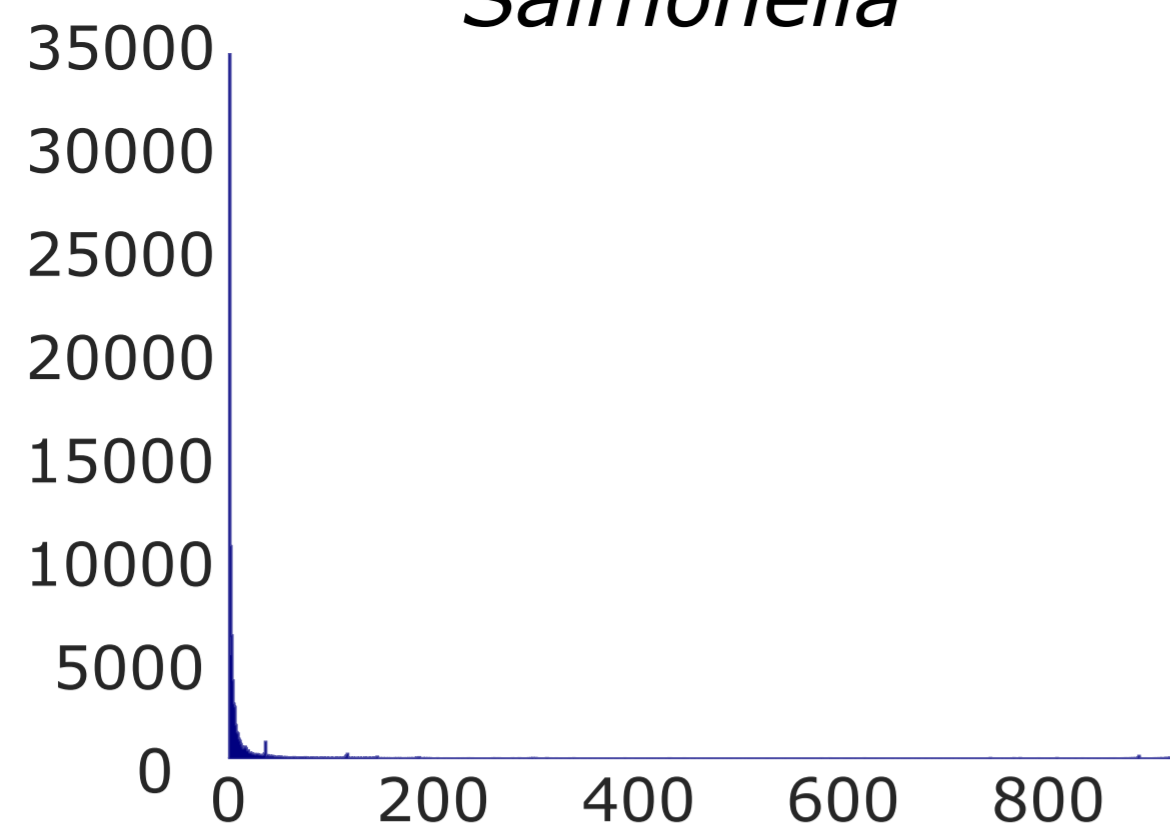

*enterica (I)*

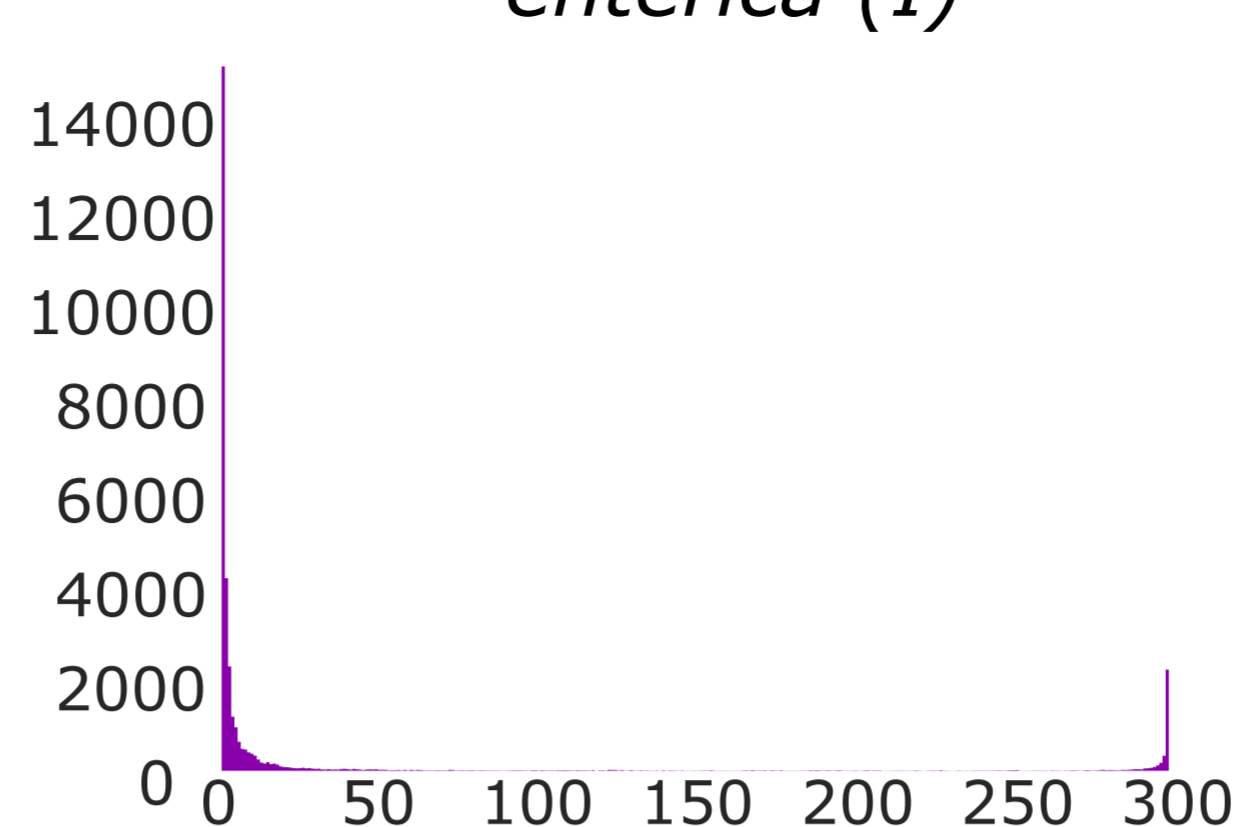

*salamae (II)*

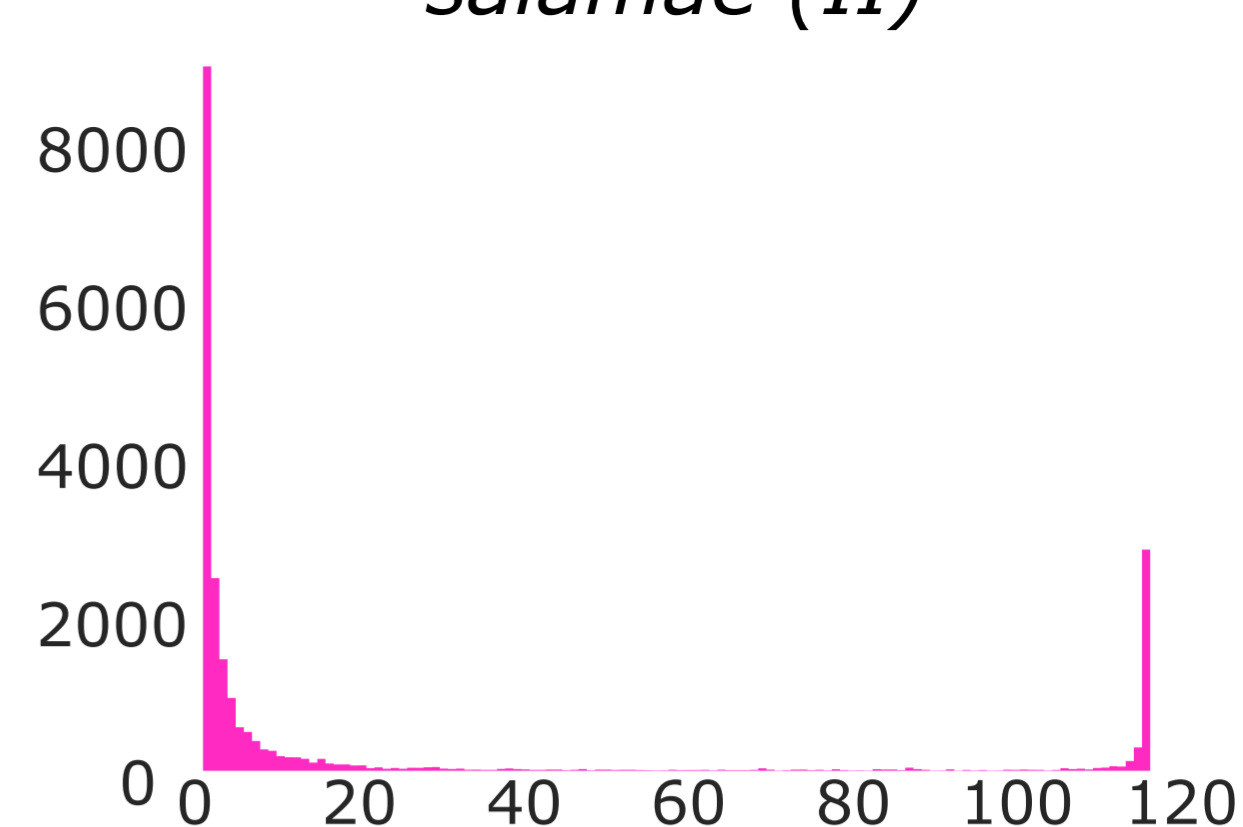

*arizonae (IIIa)*

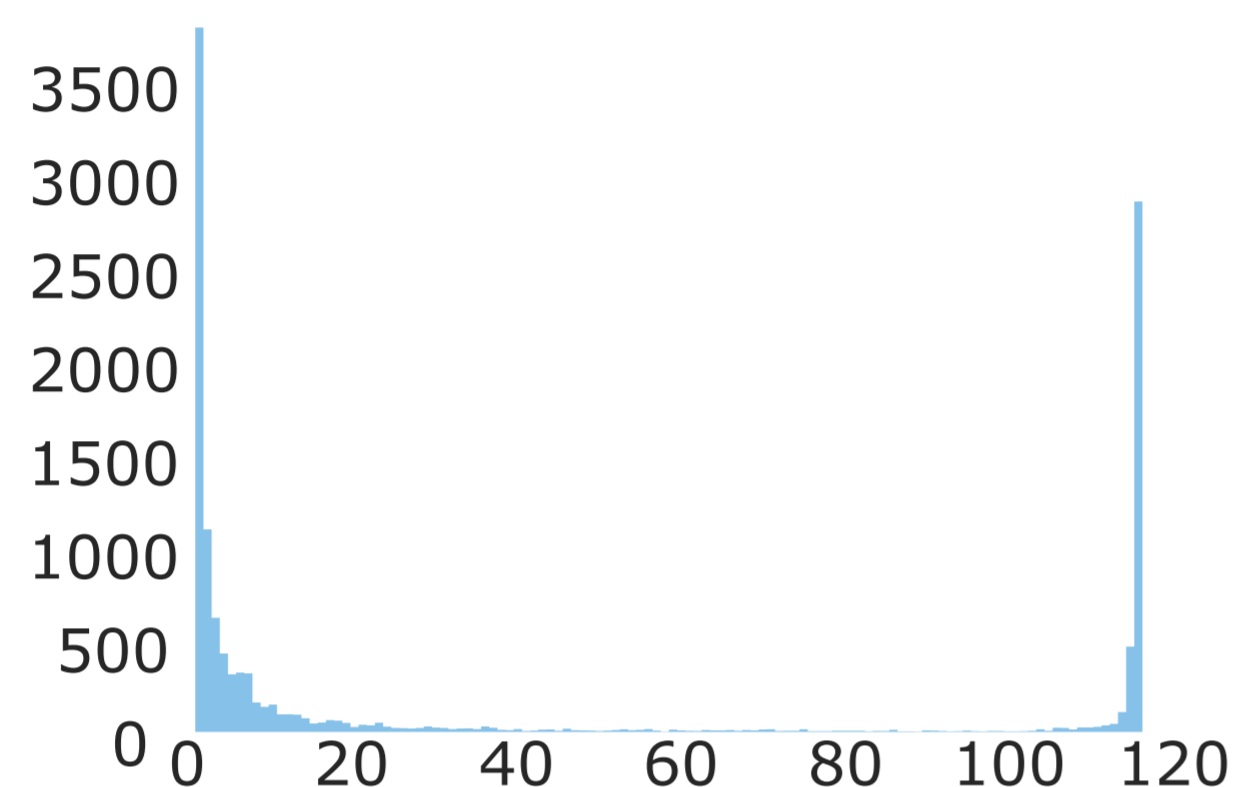

*diarizonae (IIIb)*

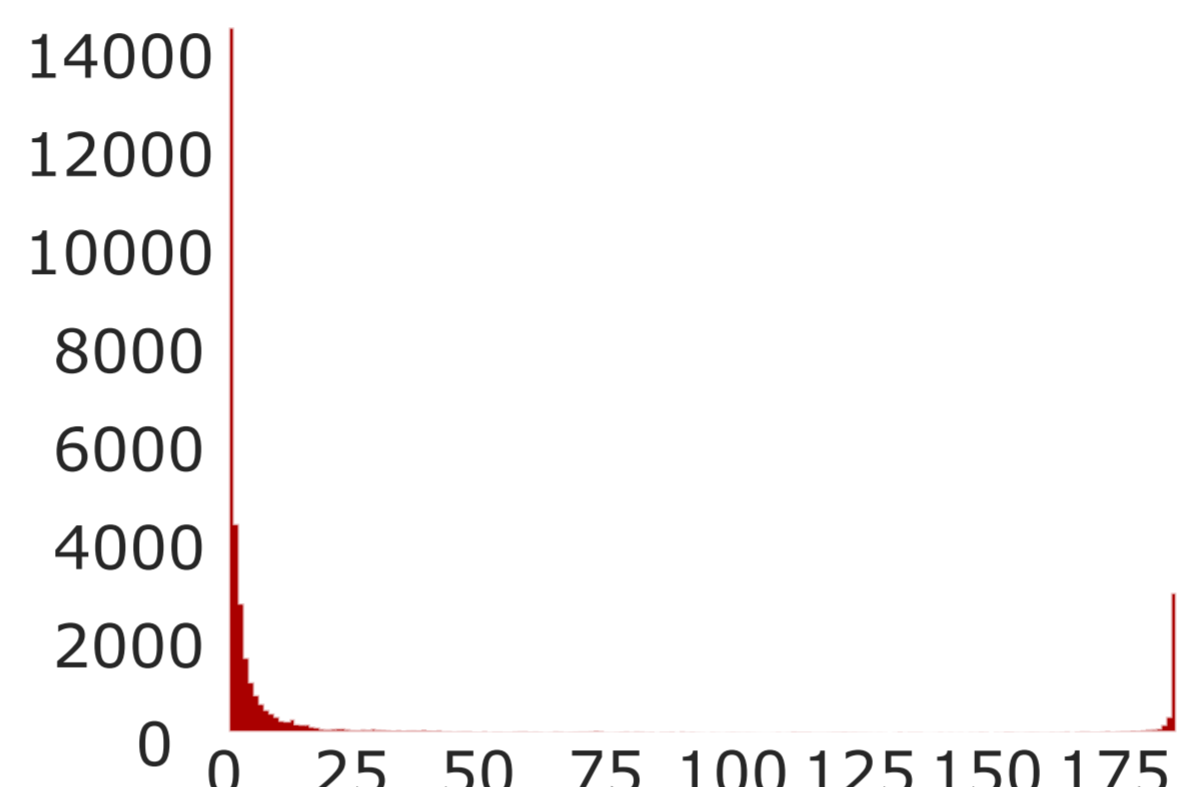

*houtenae (IV)*

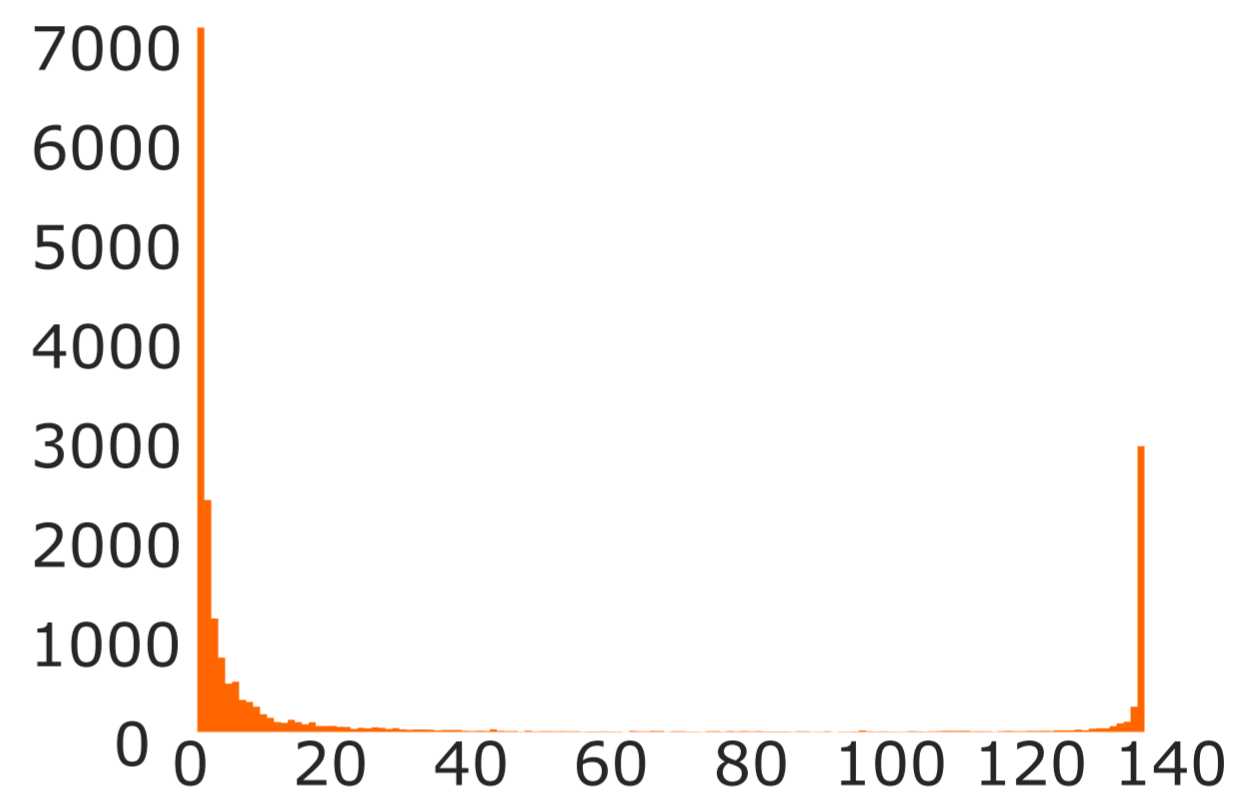

*S. bongori*

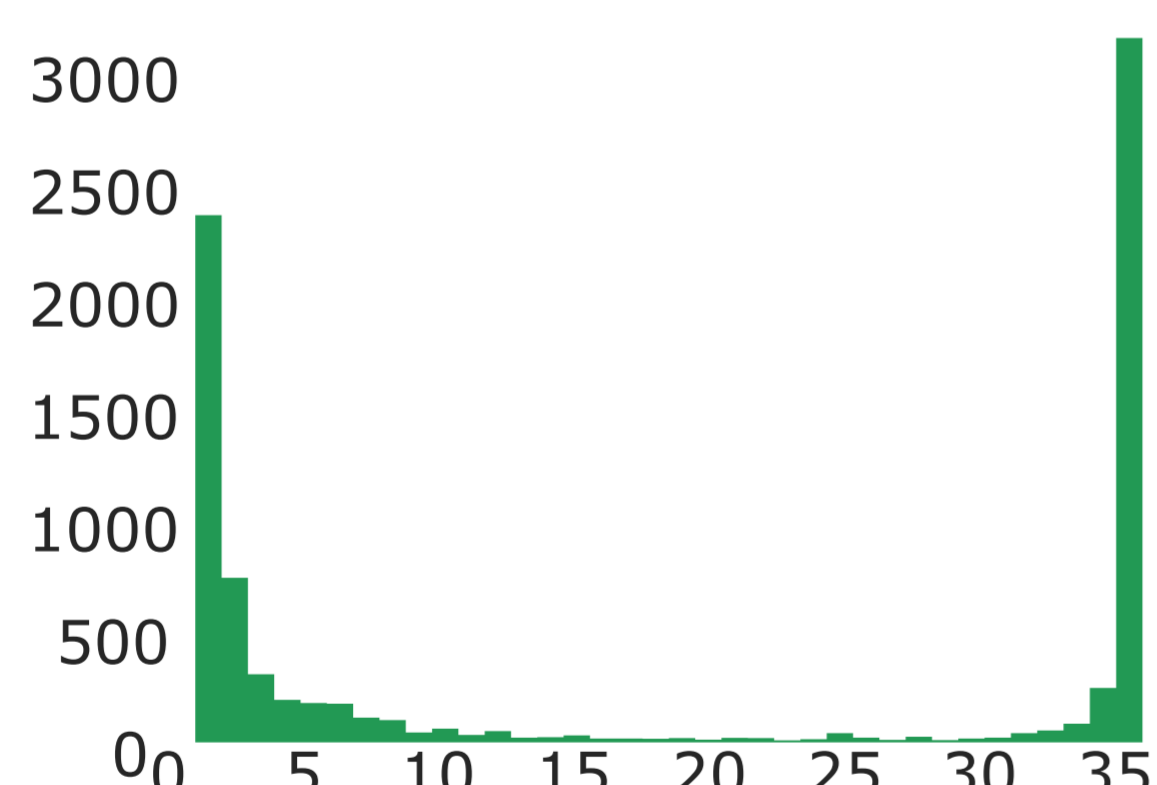

*indica (VI)*

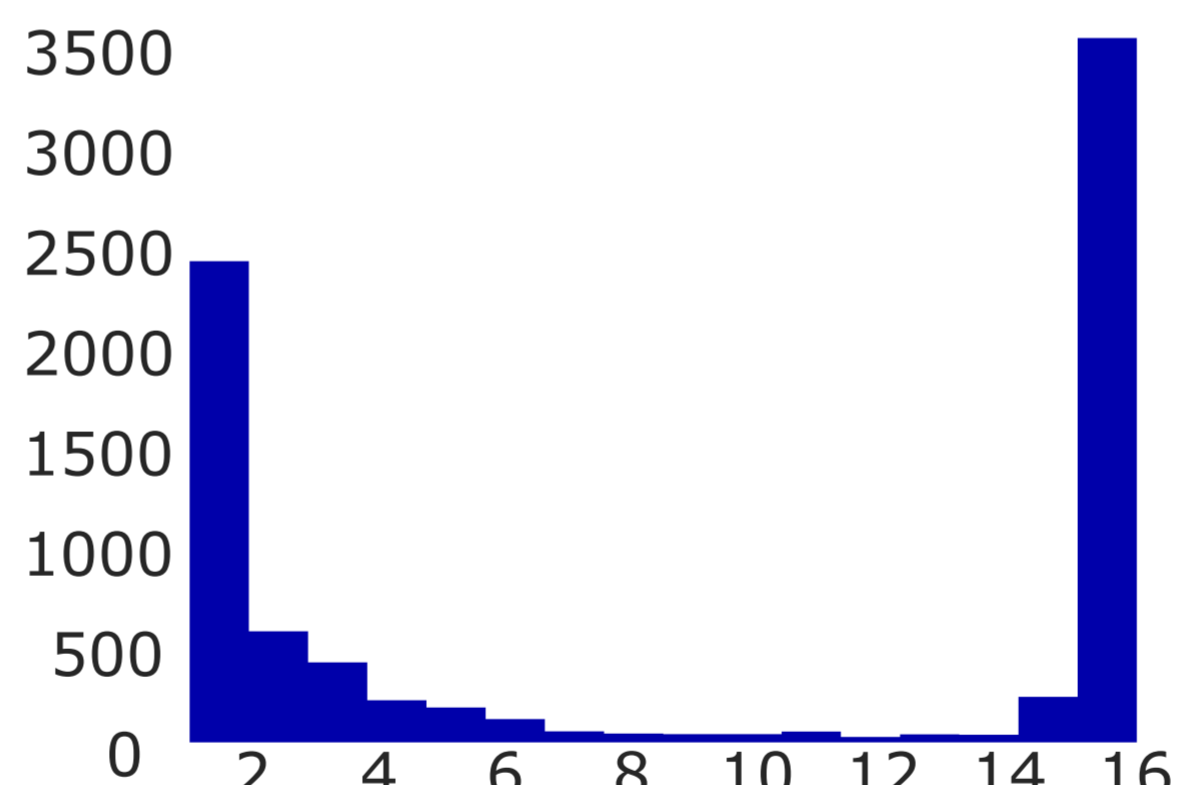

*S. e. subsp VII*

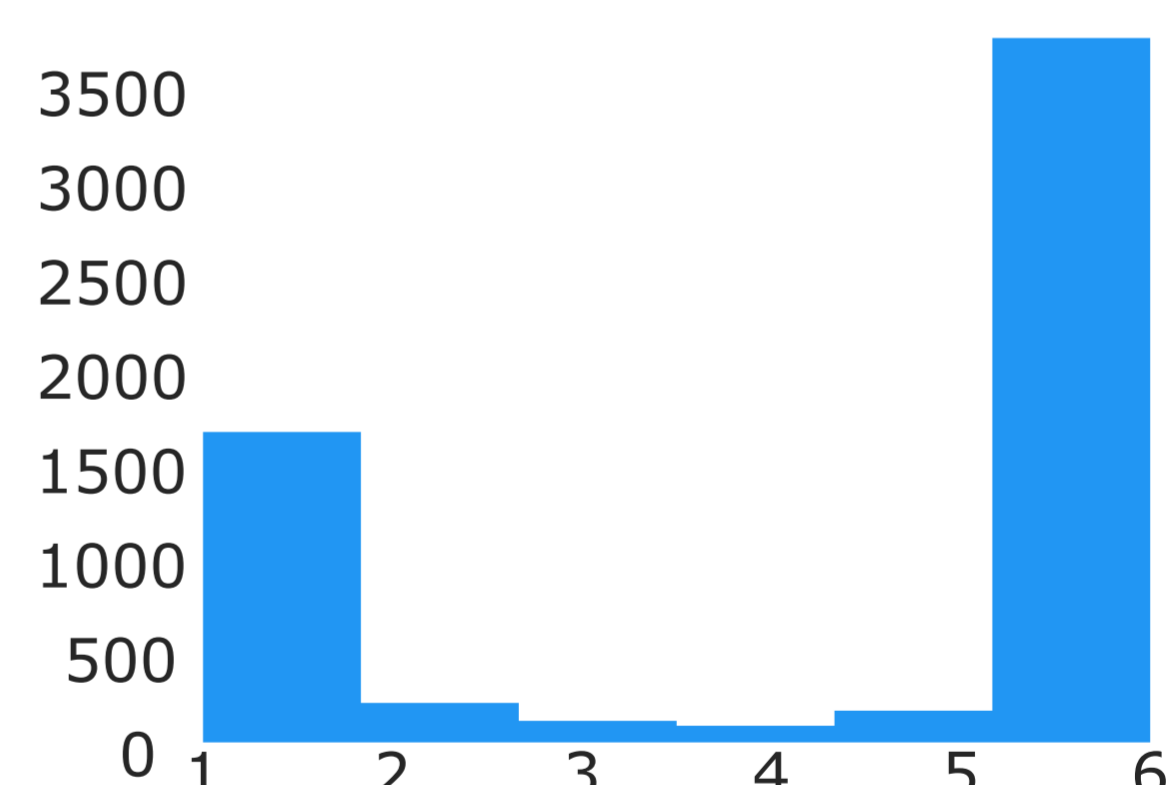

*S. e. novel subsp A*

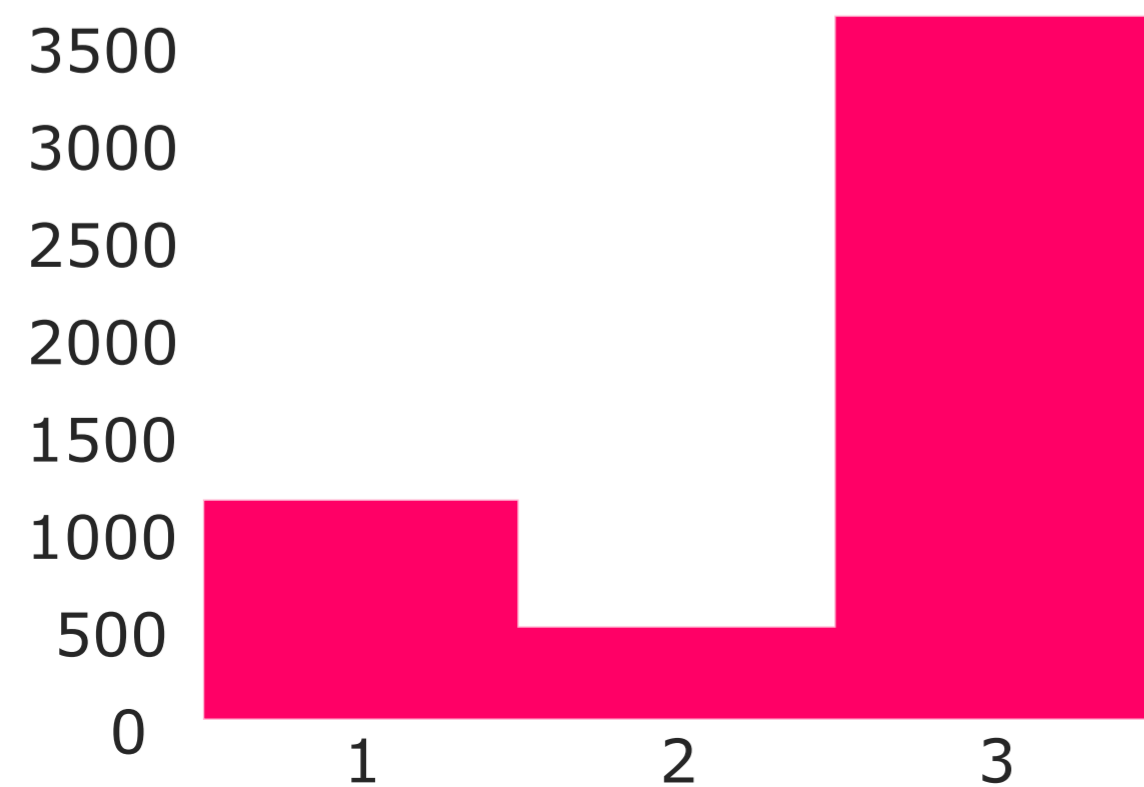

*S. e. novel subsp B*

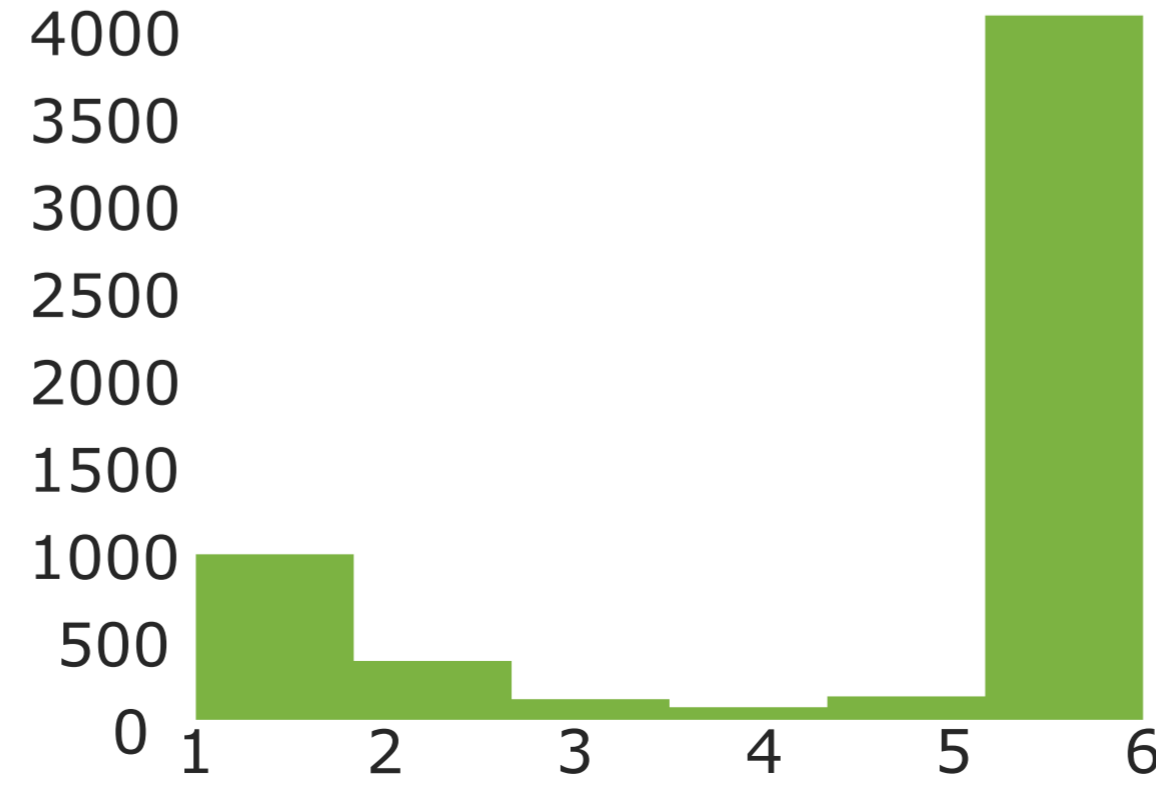

*S. e. novel subsp C*

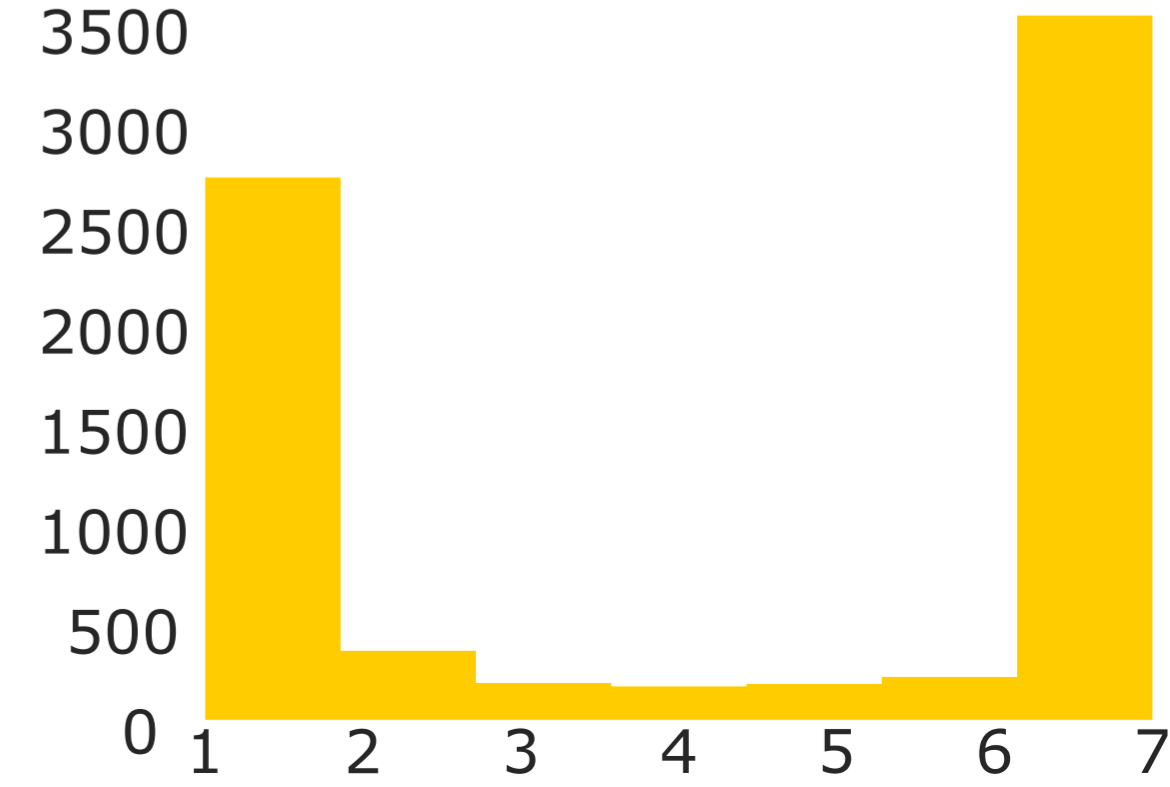

# of Genomes
