# Supplementary material for: Distinct but Intertwined Evolutionary Histories of Multiple Salmonella enterica Subspecies
Source: PubMed Central journal article supplement (PMC6967386; doi:10.1128/msystems.00515-19), 2020-01-14
Supplement: mSystems.00515-19-sf003.pdf [file mSystems.00515-19-sf003.pdf]

*S. e. enterica* (I)

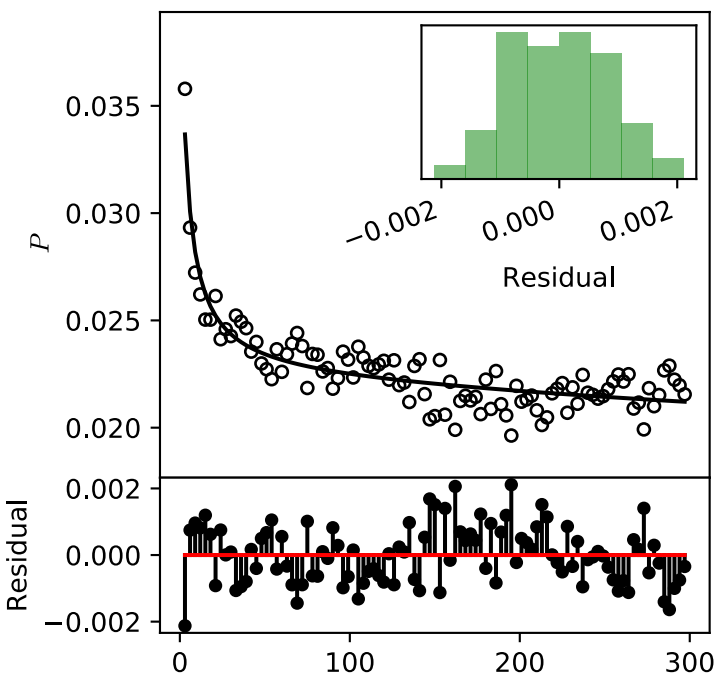

*S. e. salamae* (II)

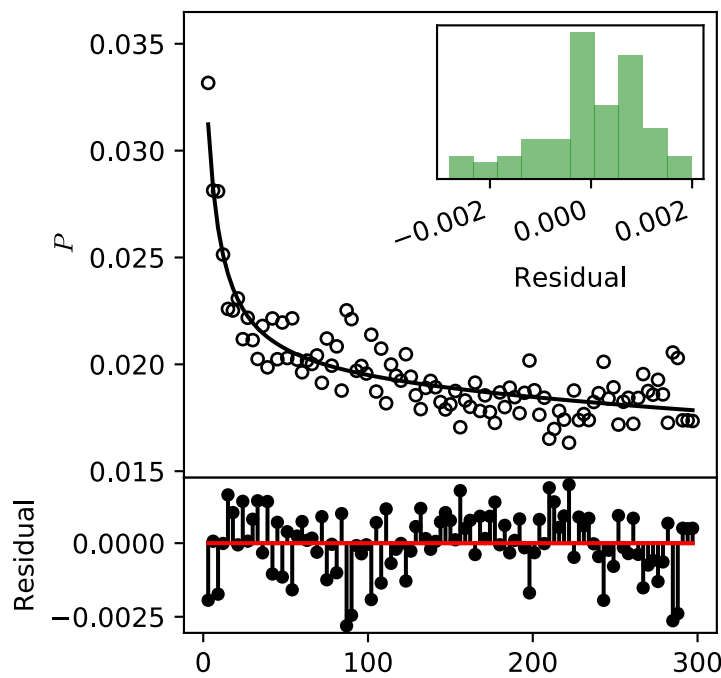

*S. e. arizonae* (IIIa)

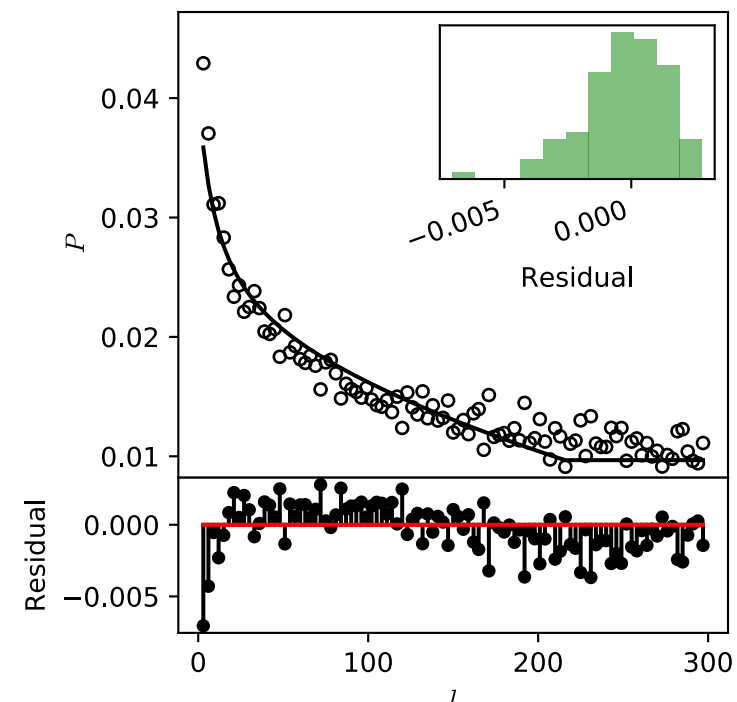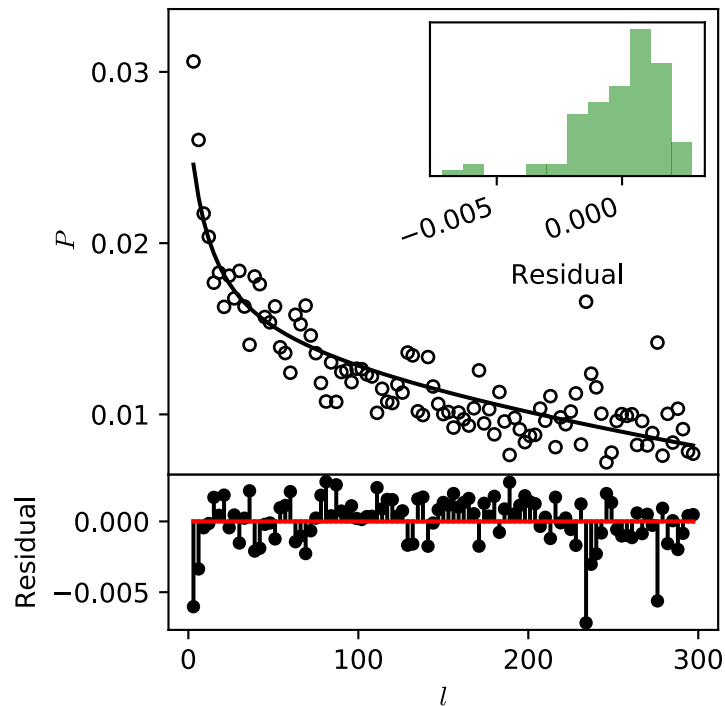

*S. e. diarizonae* (IIIb)

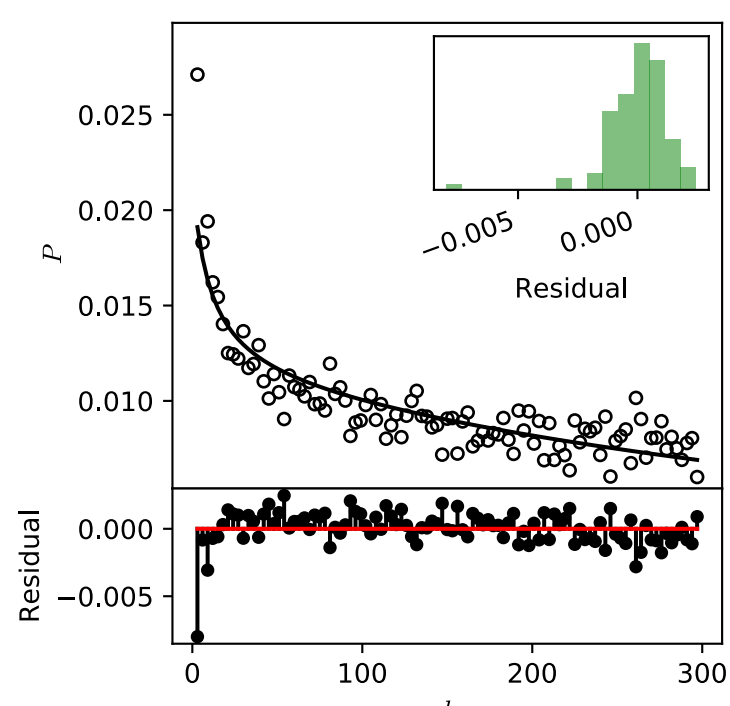

*S. e. houtenae* (IV)
