# Supplementary material for: Distinct but Intertwined Evolutionary Histories of Multiple Salmonella enterica Subspecies
Source: PubMed Central journal article supplement (PMC6967386; doi:10.1128/msystems.00515-19), 2020-01-14

# *fliC*

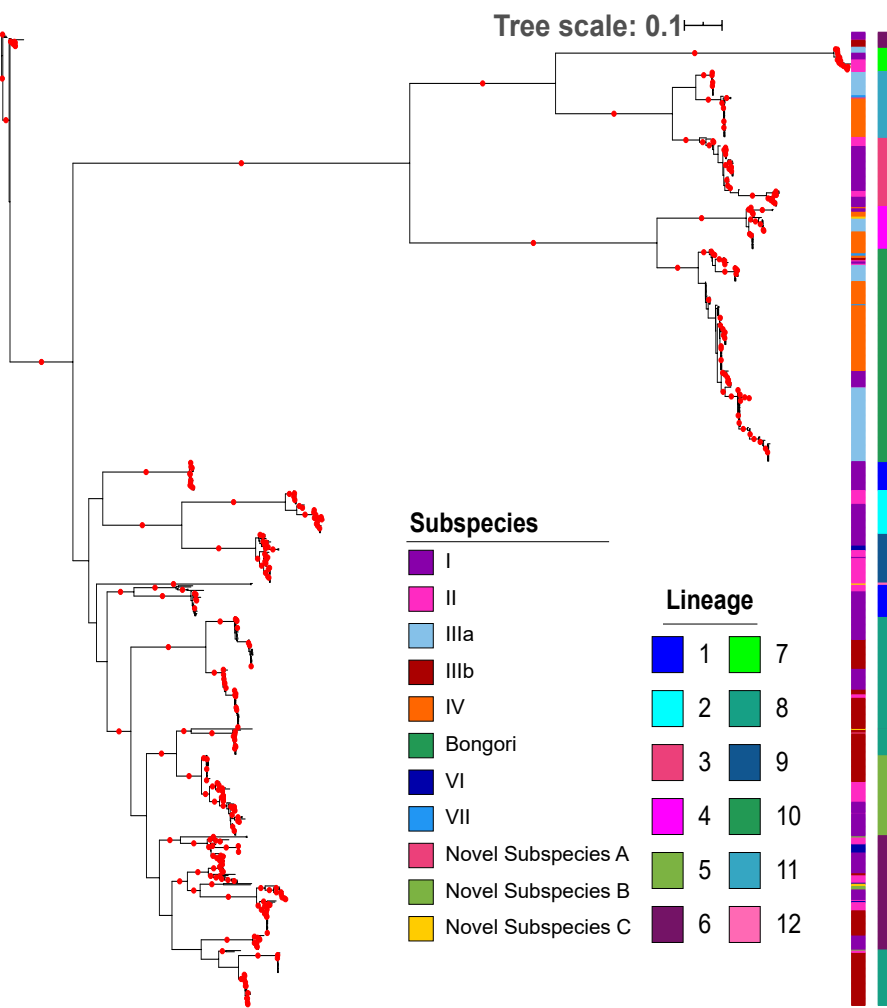

# *metE*

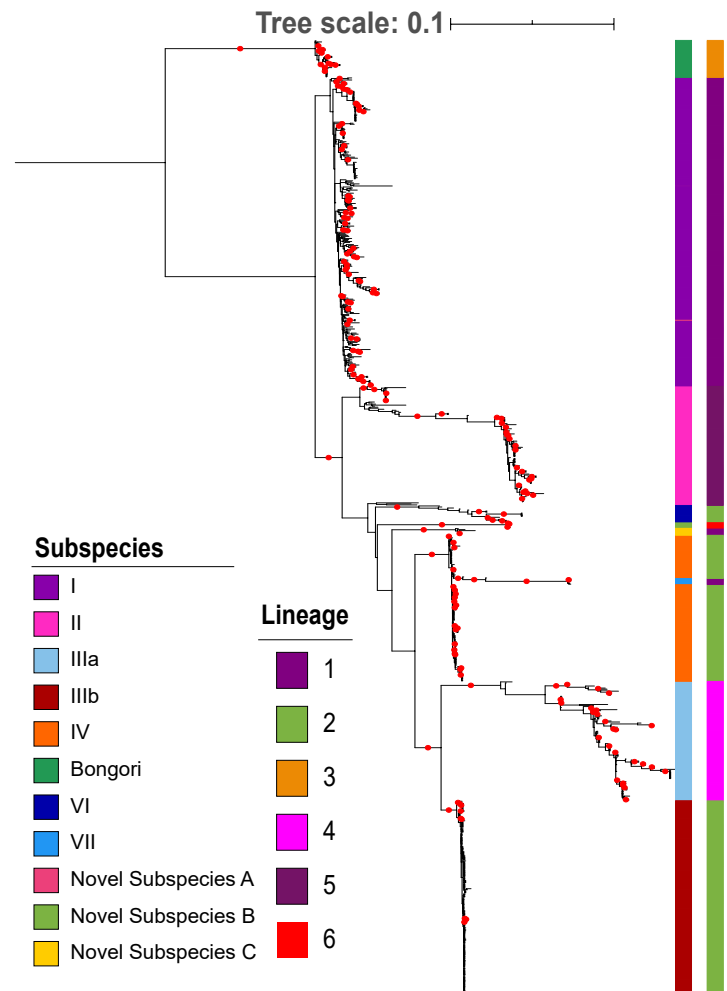

# *thiH*

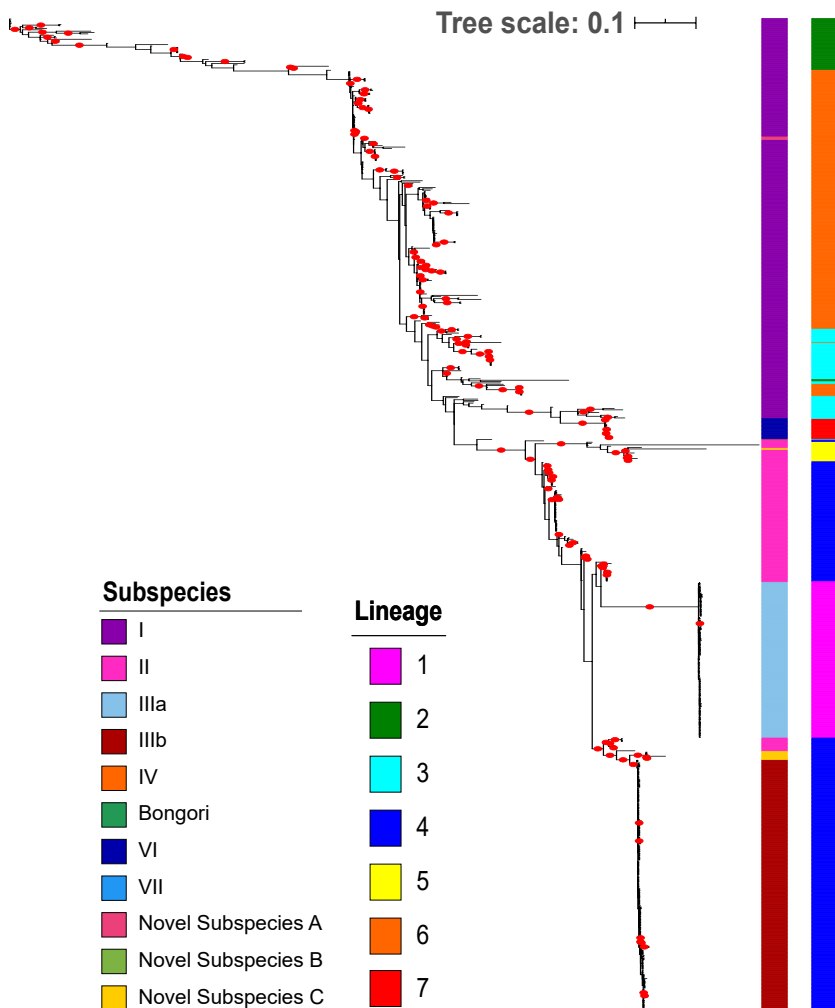

# *methH*

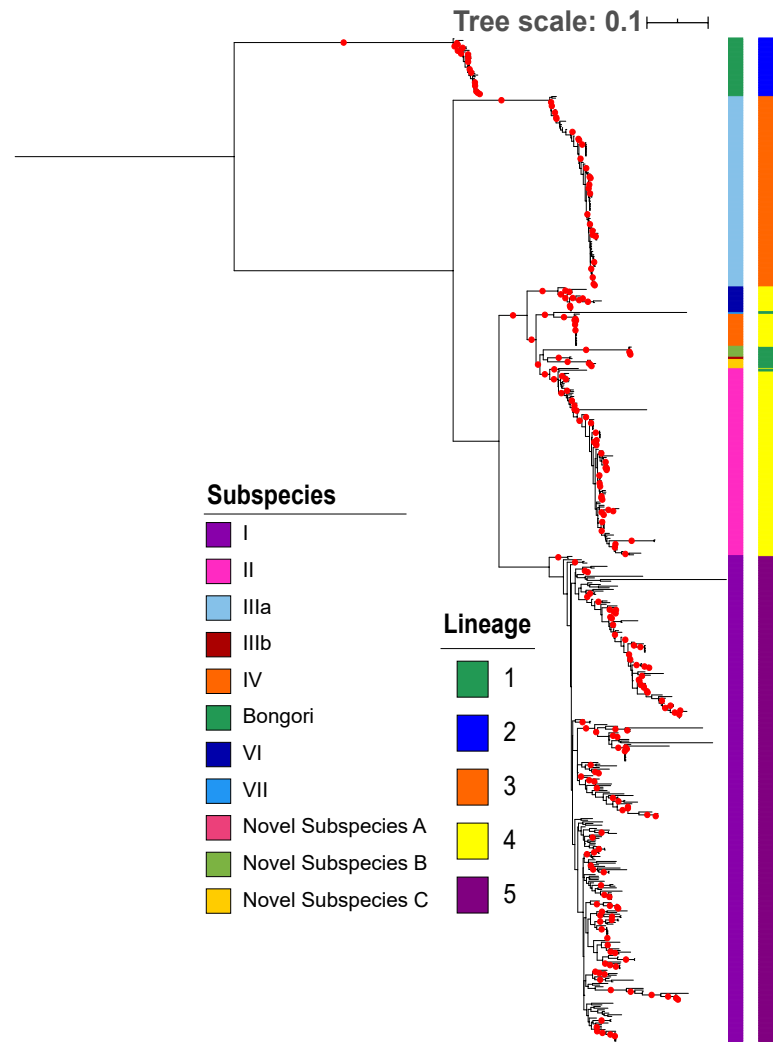

Supplement: mSystems.00515-19-sf004.pdf [file mSystems.00515-19-sf004.pdf]
